# Supplementary material
Source: Springer Nature journal article supplement (https://www.springermedizin.de/resource/supplementary/13058_2012_3149_MOESM2_ESM.pdf/9703166)
Supplement: MOESM2 [file 9703166]

SURVIVAL PROBABILITY

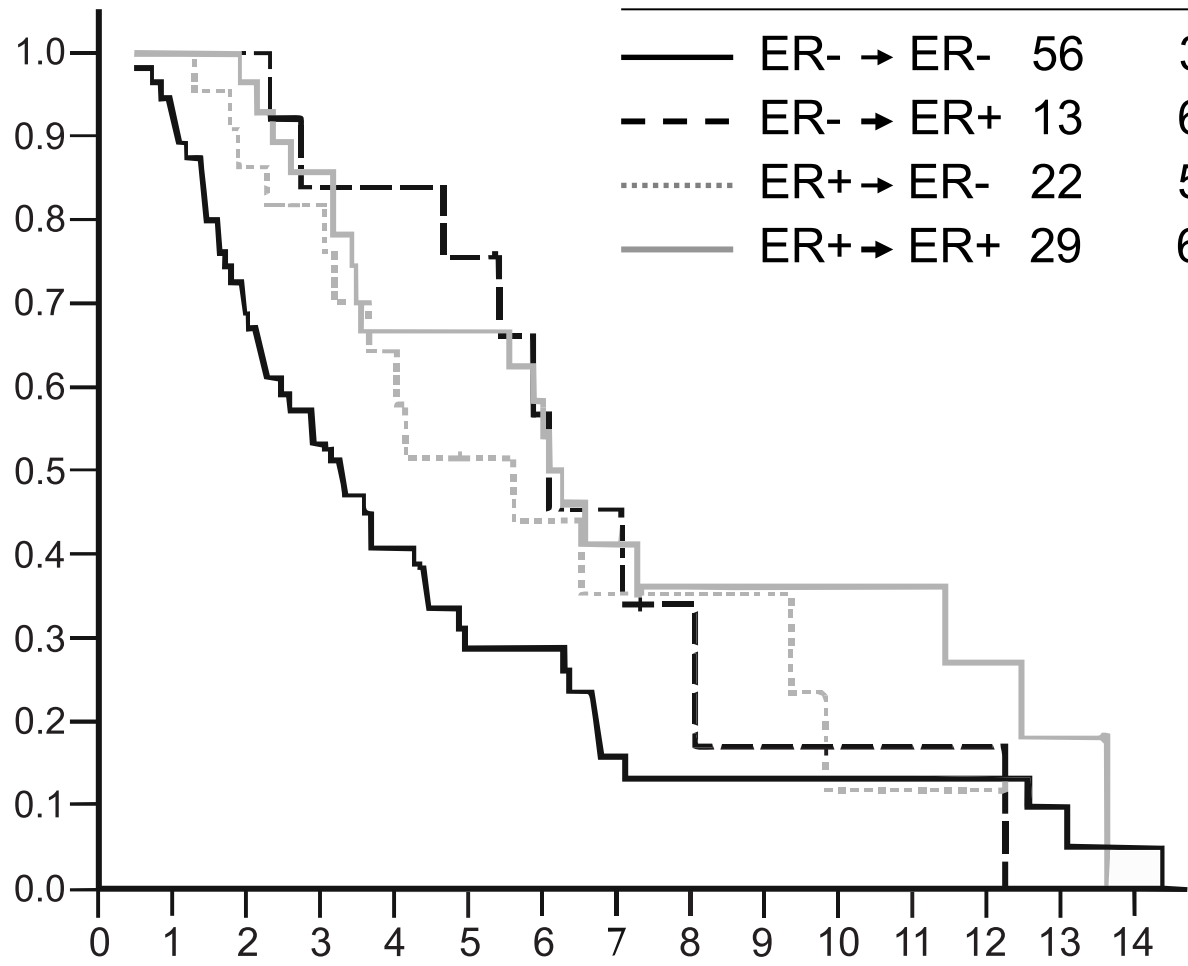

GROUP

N

MEDIAN SURVIVAL

|       |           |    |           |
|-------|-----------|----|-----------|
| —     | ER- → ER- | 56 | 3.2 years |
| - - - | ER- → ER+ | 13 | 6.1 years |
| ⋯     | ER+ → ER- | 22 | 5.6 years |
| —     | ER+ → ER+ | 29 | 6.3 years |

YEARS
